# Supplementary material
Source: Springer Nature journal article supplement (https://www.springermedizin.de/resource/supplementary/13046_2010_348_MOESM7_ESM.pdf/9661828)

# Funnel Plot of Precision by Log odds ratio

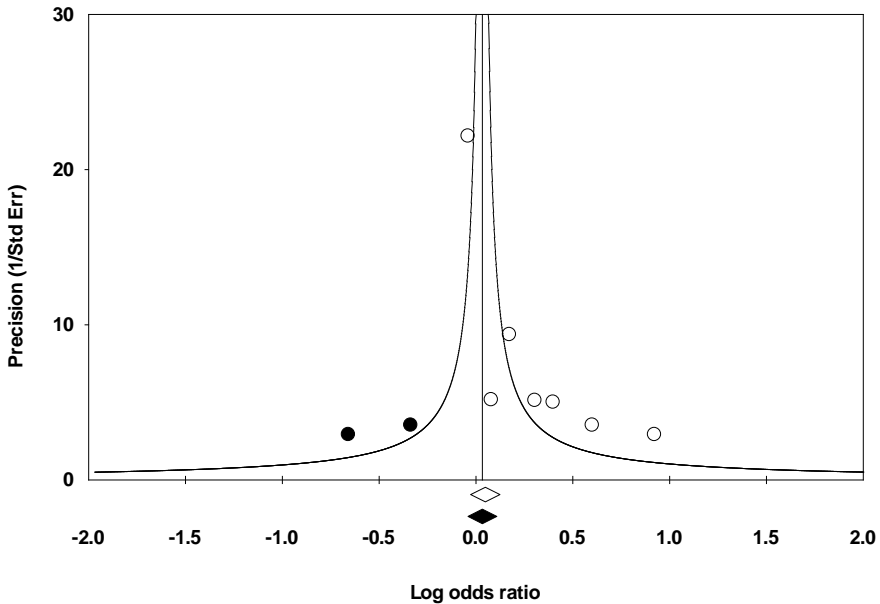

Supplement: MOESM7 [file 9661828]
